# Supplementary material
Source: PubMed Central journal article supplement (PMC9878582)
Supplement: NIHMS1863819-supplement-Supplementary.pdf [file NIHMS1863819-supplement-Supplementary.pdf]

Supplemental online material

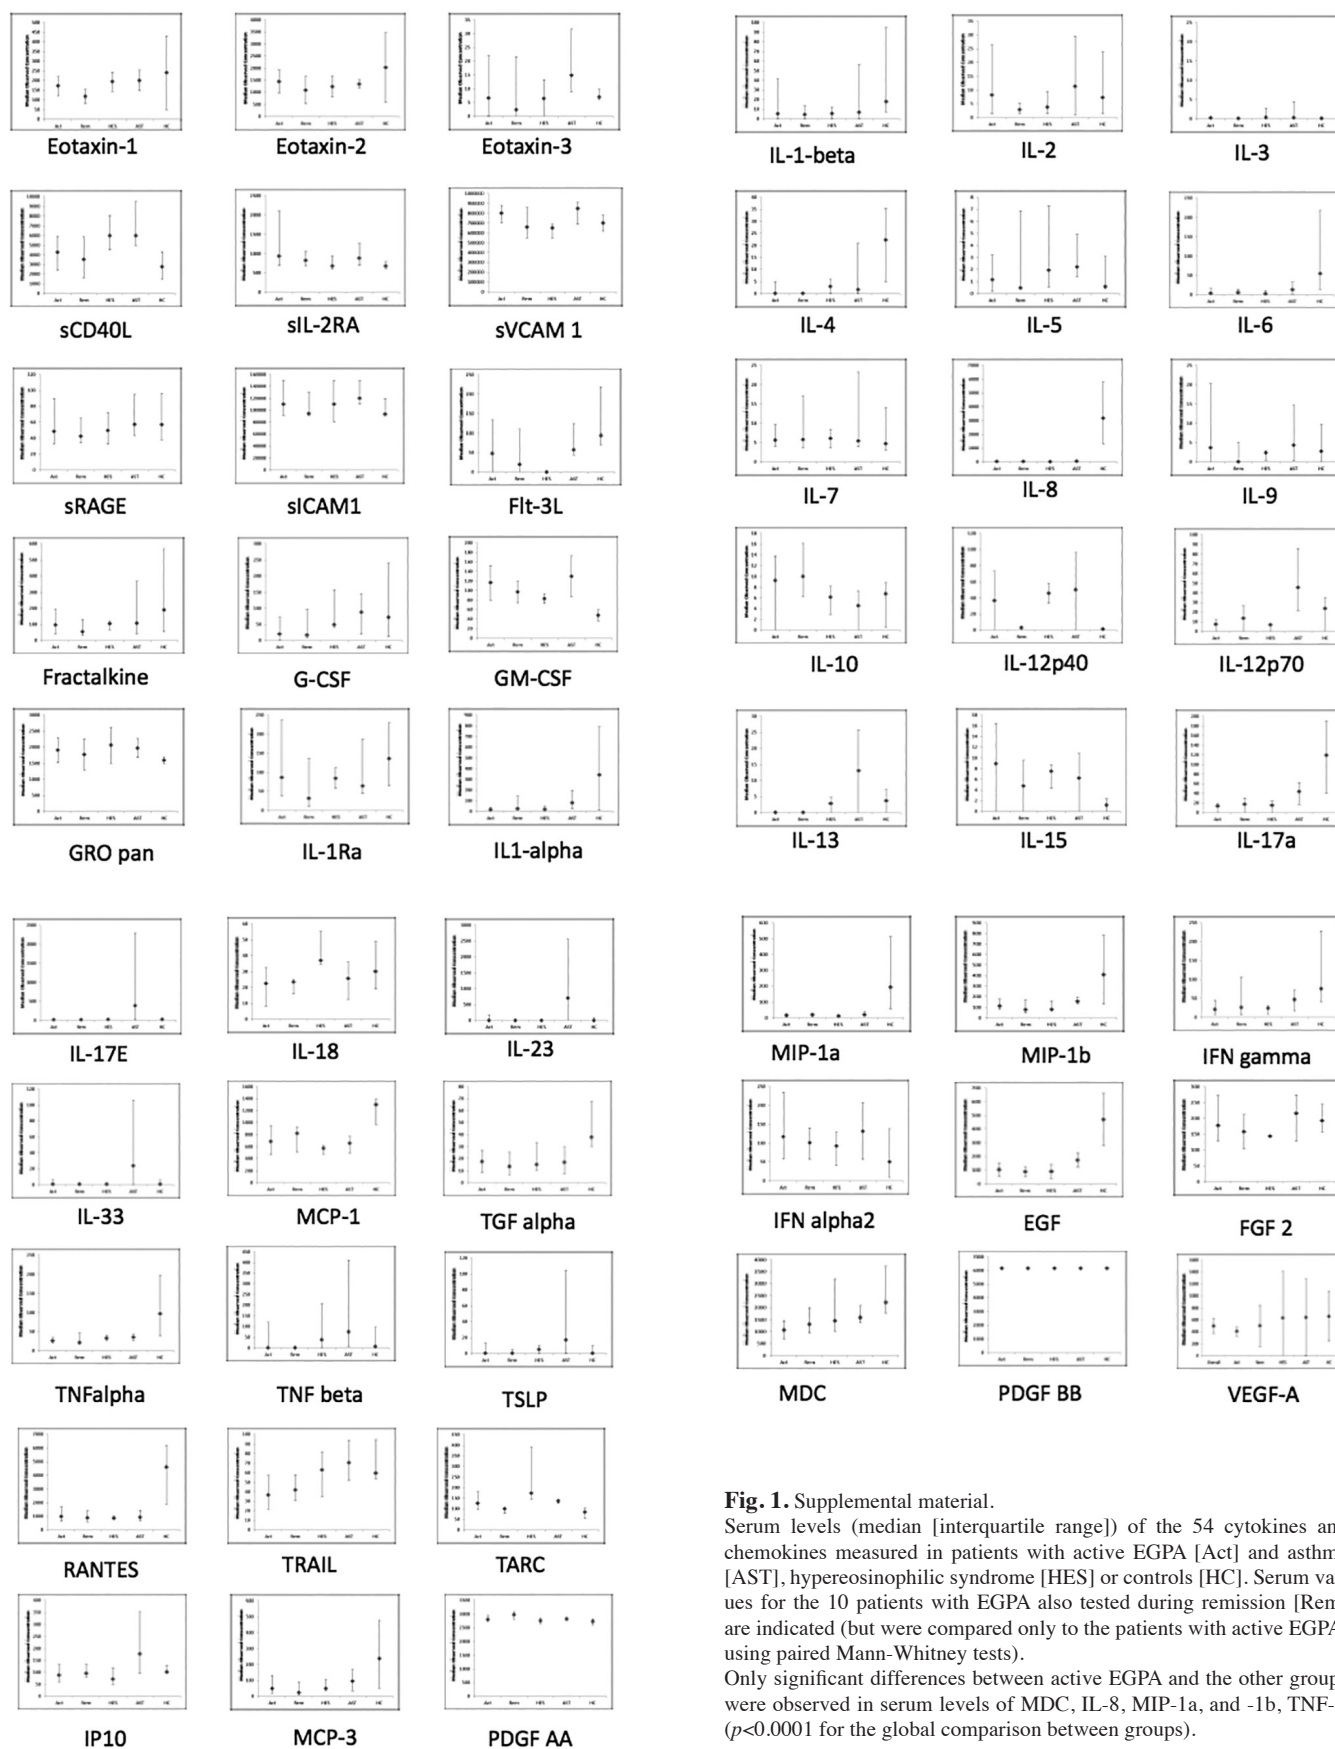

**Fig. 1.** Supplemental material. Serum levels (median [interquartile range]) of the 54 cytokines and chemokines measured in patients with active EGPA [Act] and asthma [AST], hypereosinophilic syndrome [HES] or controls [HC]. Serum values for the 10 patients with EGPA also tested during remission [Rem] are indicated (but were compared only to the patients with active EGPA, using paired Mann-Whitney tests). Only significant differences between active EGPA and the other groups were observed in serum levels of MDC, IL-8, MIP-1a, and -1b, TNF- $\alpha$  ( $p < 0.0001$  for the global comparison between groups).

**Table I.** Supplementary material.

Complete results of the logistic regression for all tested cytokines and chemokines (comparisons between values in patients with active eosinophilic granulomatosis with polyangiitis [EGPA] vs. other 3 groups – hypereosinophilic syndrome [HES], healthy controls [CTR] and asthma patients [AST]).

| Outcome   | Label 1                  | Num | Parameter | Level1 | Estimate | StdErr | LowerCL | UpperCL | ChiSq     | PVal   | ChiSq Overall | PVal Overall |
|-----------|--------------------------|-----|-----------|--------|----------|--------|---------|---------|-----------|--------|---------------|--------------|
| sICAM_1   | Number of Observations   | 64  | Intercept |        | 11.6274  | 0.0468 | 11.5357 | 11.7190 | 61834.19  | <.0001 |               |              |
|           | Noncensored Values       | 64  | Group     | HES    | 0.0240   | 0.1295 | -0.2298 | 0.2777  | 0.03      | 0.8531 | 2.37          | 0.4992       |
|           | Right Censored Values    | 0   |           | CTR    | -0.1143  | 0.1046 | -0.3192 | 0.0906  | 1.20      | 0.2742 |               |              |
|           | Left Censored Values     | 0   |           | AST    | 0.0962   | 0.1145 | -0.1283 | 0.3206  | 0.70      | 0.4012 |               |              |
|           | Interval Censored Values | 0   |           | ACT    | 0.0000   |        |         |         |           |        |               |              |
|           |                          |     |           | Scale  |          | 0.2957 | 0.0261  | 0.2487  | 0.3517    |        |               |              |
| sVCAM_1   | Number of Observations   | 64  | Intercept |        | 13.6094  | 0.0351 | 13.5406 | 13.6783 | 150170.85 | <.0001 |               |              |
|           | Noncensored Values       | 64  | Group     | HES    | -0.1841  | 0.0972 | -0.3747 | 0.0065  | 3.58      | 0.0583 | 7.16          | 0.0670       |
|           | Right Censored Values    | 0   |           | CTR    | -0.1644  | 0.0785 | -0.3183 | -0.0105 | 4.38      | 0.0363 |               |              |
|           | Left Censored Values     | 0   |           | AST    | -0.0036  | 0.0860 | -0.1722 | 0.1651  | 0.00      | 0.9670 |               |              |
|           | Interval Censored Values | 0   |           | ACT    | 0.0000   |        |         |         |           |        |               |              |
|           |                          |     |           | Scale  |          | 0.2221 | 0.0196  | 0.1868  | 0.2641    |        |               |              |
| IL17_E    | Number of Observations   | 64  | Intercept |        | 4.6342   | 0.6193 | 3.4204  | 5.8481  | 55.99     | <.0001 |               |              |
|           | Noncensored Values       | 63  | Group     | HES    | -1.1737  | 1.7143 | -4.5338 | 2.1863  | 0.47      | 0.4936 | 1.53          | 0.6758       |
|           | Right Censored Values    | 1   |           | CTR    | -0.9613  | 1.3845 | -3.6748 | 1.7523  | 0.48      | 0.4875 |               |              |
|           | Left Censored Values     | 0   |           | AST    | 0.9490   | 1.5166 | -2.0235 | 3.9216  | 0.39      | 0.5315 |               |              |
|           | Interval Censored Values | 0   |           | ACT    | 0.0000   |        |         |         |           |        |               |              |
|           |                          |     |           | Scale  |          | 3.9157 | 0.3514  | 3.2842  | 4.6687    |        |               |              |
| EGF       | Number of Observations   | 64  | Intercept |        | 4.5253   | 0.1839 | 4.1650  | 4.8857  | 605.83    | <.0001 |               |              |
|           | Noncensored Values       | 62  | Group     | HES    | 0.1005   | 0.5082 | -0.8956 | 1.0967  | 0.04      | 0.8432 | 14.64         | 0.0022       |
|           | Right Censored Values    | 0   |           | CTR    | 1.5249   | 0.4105 | 0.7203  | 2.3294  | 13.80     | 0.0002 |               |              |
|           | Left Censored Values     | 2   |           | AST    | 0.6434   | 0.4496 | -0.2378 | 1.5247  | 2.05      | 0.1524 |               |              |
|           | Interval Censored Values | 0   |           | ACT    | 0.0000   |        |         |         |           |        |               |              |
|           |                          |     |           | Scale  |          | 1.1606 | 0.1055  | 0.9712  | 1.3869    |        |               |              |
| FGF_2     | Number of Observations   | 64  | Intercept |        | 5.1878   | 0.1135 | 4.9653  | 5.4103  | 2088.55   | <.0001 |               |              |
|           | Noncensored Values       | 64  | Group     | HES    | 0.1208   | 0.3143 | -0.4952 | 0.7369  | 0.15      | 0.7007 | 1.29          | 0.7317       |
|           | Right Censored Values    | 0   |           | CTR    | 0.2485   | 0.2538 | -0.2490 | 0.7460  | 0.96      | 0.3275 |               |              |
|           | Left Censored Values     | 0   |           | AST    | 0.2004   | 0.2781 | -0.3445 | 0.7454  | 0.52      | 0.4710 |               |              |
|           | Interval Censored Values | 0   |           | ACT    | 0.0000   |        |         |         |           |        |               |              |
|           |                          |     |           | Scale  |          | 0.7179 | 0.0635  | 0.6037  | 0.8537    |        |               |              |
| Eotaxin_1 | Number of Observations   | 64  | Intercept |        | 5.0803   | 0.0794 | 4.9246  | 5.2360  | 4090.66   | <.0001 |               |              |
|           | Noncensored Values       | 64  | Group     | HES    | 0.2948   | 0.2199 | -0.1363 | 0.7259  | 1.80      | 0.1801 | 5.13          | 0.1623       |
|           | Right Censored Values    | 0   |           | CTR    | 0.3065   | 0.1776 | -0.0416 | 0.6546  | 2.98      | 0.0844 |               |              |
|           | Left Censored Values     | 0   |           | AST    | 0.2760   | 0.1946 | -0.1053 | 0.6574  | 2.01      | 0.1560 |               |              |
|           | Interval Censored Values | 0   |           | ACT    | 0.0000   |        |         |         |           |        |               |              |
|           |                          |     |           | Scale  |          | 0.5024 | 0.0444  | 0.4225  | 0.5974    |        |               |              |
| TGF_a     | Number of Observations   | 64  | Intercept |        | 2.9220   | 0.1875 | 2.5546  | 3.2894  | 242.96    | <.0001 |               |              |
|           | Noncensored Values       | 63  | Group     | HES    | 0.0574   | 0.5188 | -0.9594 | 1.0741  | 0.01      | 0.9120 | 3.07          | 0.3816       |
|           | Right Censored Values    | 1   |           | CTR    | 0.7260   | 0.4189 | -0.0951 | 1.5471  | 3.00      | 0.0831 |               |              |
|           | Left Censored Values     | 0   |           | AST    | 0.2178   | 0.4589 | -0.6816 | 1.1173  | 0.23      | 0.6350 |               |              |
|           | Interval Censored Values | 0   |           | ACT    | 0.0000   |        |         |         |           |        |               |              |
|           |                          |     |           | Scale  |          | 1.1848 | 0.1062  | 0.9939  | 1.4124    |        |               |              |
| G-CSF     | Number of Observations   | 64  | Intercept |        | 2.0894   | 0.4192 | 1.2678  | 2.9109  | 24.85     | <.0001 |               |              |
|           | Noncensored Values       | 53  | Group     | HES    | 2.1992   | 1.1353 | -0.0260 | 4.4244  | 3.75      | 0.0527 | 7.24          | 0.0646       |
|           | Right Censored Values    | 0   |           | CTR    | 1.6826   | 0.9223 | -0.1252 | 3.4903  | 3.33      | 0.0681 |               |              |
|           | Left Censored Values     | 11  |           | AST    | 1.6178   | 1.0111 | -0.3640 | 3.5995  | 2.56      | 0.1096 |               |              |
|           | Interval Censored Values | 0   |           | ACT    | 0.0000   |        |         |         |           |        |               |              |
|           |                          |     |           | Scale  |          | 2.5845 | 0.2653  | 2.1134  | 3.1605    |        |               |              |
| Flt_3L    | Number of Observations   | 64  | Intercept |        | 1.4437   | 0.6479 | 0.1737  | 2.7136  | 4.96      | 0.0259 |               |              |
|           | Noncensored Values       | 45  | Group     | HES    | -5.2477  | 2.1630 | -9.4871 | -1.0083 | 5.89      | 0.0153 | 14.79         | 0.0020       |
|           | Right Censored Values    | 0   |           | CTR    | 3.3714   | 1.3913 | 0.6444  | 6.0984  | 5.87      | 0.0154 |               |              |
|           | Left Censored Values     | 19  |           | AST    | 2.1108   | 1.5312 | -0.8903 | 5.1118  | 1.90      | 0.1680 |               |              |
|           | Interval Censored Values | 0   |           | ACT    | 0.0000   |        |         |         |           |        |               |              |
|           |                          |     |           | Scale  |          | 3.8936 | 0.4485  | 3.1067  | 4.8797    |        |               |              |

| Outcome     | Label 1                  | Num | Parameter | Level1 | Estimate | StdErr | LowerCL | UpperCL | ChiSq   | PVal   | ChiSq Overall | PVal Overall |
|-------------|--------------------------|-----|-----------|--------|----------|--------|---------|---------|---------|--------|---------------|--------------|
| GM_CSF      | Number of Observations   | 64  | Intercept |        | 4.8984   | 0.1446 | 4.6149  | 5.1819  | 1147.08 | <.0001 |               |              |
|             | Noncensored Values       | 64  | Group     | HES    | -0.1267  | 0.4005 | -0.9116 | 0.6582  | 0.10    | 0.7516 | 6.48          | 0.0905       |
|             | Right Censored Values    | 0   |           | CTR    | -0.8166  | 0.3234 | -1.4505 | -0.1828 | 6.38    | 0.0116 |               |              |
|             | Left Censored Values     | 0   |           | AST    | -0.0533  | 0.3543 | -0.7476 | 0.6411  | 0.02    | 0.8805 |               |              |
|             | Interval Censored Values | 0   |           | ACT    | 0.0000   |        |         |         |         |        |               |              |
|             |                          |     |           | Scale  |          | 0.9147 | 0.0809  | 0.7692  | 1.0877  |        |               |              |
| Fractalkine | Number of Observations   | 64  | Intercept |        | 4.3239   | 0.2589 | 3.8165  | 4.8314  | 278.92  | <.0001 |               |              |
|             | Noncensored Values       | 61  | Group     | HES    | 0.5729   | 0.7156 | -0.8297 | 1.9754  | 0.64    | 0.4234 | 3.92          | 0.2699       |
|             | Right Censored Values    | 0   |           | CTR    | 1.1071   | 0.5780 | -0.0257 | 2.2399  | 3.67    | 0.0554 |               |              |
|             | Left Censored Values     | 3   |           | AST    | 0.2071   | 0.6355 | -1.0385 | 1.4528  | 0.11    | 0.7445 |               |              |
|             | Interval Censored Values | 0   |           | ACT    | 0.0000   |        |         |         |         |        |               |              |
|             |                          |     |           | Scale  |          | 1.6341 | 0.1507  | 1.3639  | 1.9578  |        |               |              |
| IFNa2       | Number of Observations   | 64  | Intercept |        | 4.6556   | 0.2067 | 4.2506  | 5.0606  | 507.55  | <.0001 |               |              |
|             | Noncensored Values       | 63  | Group     | HES    | 0.0635   | 0.5718 | -1.0572 | 1.1841  | 0.01    | 0.9116 | 7.70          | 0.0527       |
|             | Right Censored Values    | 0   |           | CTR    | -1.2215  | 0.4618 | -2.1265 | -0.3164 | 7.00    | 0.0082 |               |              |
|             | Left Censored Values     | 1   |           | AST    | 0.1011   | 0.5058 | -0.8904 | 1.0925  | 0.04    | 0.8417 |               |              |
|             | Interval Censored Values | 0   |           | ACT    | 0.0000   |        |         |         |         |        |               |              |
|             |                          |     |           | Scale  |          | 1.3059 | 0.1170  | 1.0955  | 1.5567  |        |               |              |
| IFNy        | Number of Observations   | 64  | Intercept |        | 3.0131   | 0.1927 | 2.6355  | 3.3907  | 244.54  | <.0001 |               |              |
|             | Noncensored Values       | 64  | Group     | HES    | 0.4299   | 0.5335 | -0.6157 | 1.4756  | 0.65    | 0.4203 | 14.13         | 0.0027       |
|             | Right Censored Values    | 0   |           | CTR    | 1.5141   | 0.4308 | 0.6696  | 2.3585  | 12.35   | 0.0004 |               |              |
|             | Left Censored Values     | 0   |           | AST    | 0.9213   | 0.4720 | -0.0037 | 1.8464  | 3.81    | 0.0509 |               |              |
|             | Interval Censored Values | 0   |           | ACT    | 0.0000   |        |         |         |         |        |               |              |
|             |                          |     |           | Scale  |          | 1.2186 | 0.1077  | 1.0248  | 1.4491  |        |               |              |
| GRO_pan     | Number of Observations   | 64  | Intercept |        | 7.5577   | 0.0773 | 7.4062  | 7.7091  | 9567.37 | <.0001 |               |              |
|             | Noncensored Values       | 64  | Group     | HES    | -0.0644  | 0.2139 | -0.4837 | 0.3549  | 0.09    | 0.7635 | 2.29          | 0.5152       |
|             | Right Censored Values    | 0   |           | CTR    | 0.2408   | 0.1728 | -0.0979 | 0.5794  | 1.94    | 0.1634 |               |              |
|             | Left Censored Values     | 0   |           | AST    | 0.0813   | 0.1893 | -0.2897 | 0.4522  | 0.18    | 0.6676 |               |              |
|             | Interval Censored Values | 0   |           | ACT    | 0.0000   |        |         |         |         |        |               |              |
|             |                          |     |           | Scale  |          | 0.4887 | 0.0432  | 0.4109  | 0.5811  |        |               |              |
| IL_10       | Number of Observations   | 64  | Intercept |        | 1.8603   | 0.3223 | 1.2286  | 2.4921  | 33.31   | <.0001 |               |              |
|             | Noncensored Values       | 57  | Group     | HES    | 0.0762   | 0.8953 | -1.6787 | 1.8310  | 0.01    | 0.9322 | 0.36          | 0.9485       |
|             | Right Censored Values    | 0   |           | CTR    | 0.2499   | 0.7199 | -1.1612 | 1.6609  | 0.12    | 0.7285 |               |              |
|             | Left Censored Values     | 7   |           | AST    | -0.3238  | 0.7906 | -1.8735 | 1.2258  | 0.17    | 0.6821 |               |              |
|             | Interval Censored Values | 0   |           | ACT    | 0.0000   |        |         |         |         |        |               |              |
|             |                          |     |           | Scale  |          | 2.0227 | 0.1962  | 1.6725  | 2.4462  |        |               |              |
| MCP_3       | Number of Observations   | 64  | Intercept |        | 3.8004   | 0.2454 | 3.3194  | 4.2813  | 239.89  | <.0001 |               |              |
|             | Noncensored Values       | 59  | Group     | HES    | 0.4570   | 0.6750 | -0.8659 | 1.7799  | 0.46    | 0.4984 | 6.39          | 0.0942       |
|             | Right Censored Values    | 0   |           | CTR    | 1.3678   | 0.5454 | 0.2990  | 2.4367  | 6.29    | 0.0121 |               |              |
|             | Left Censored Values     | 5   |           | AST    | 0.3851   | 0.6009 | -0.7927 | 1.5628  | 0.41    | 0.5216 |               |              |
|             | Interval Censored Values | 0   |           | ACT    | 0.0000   |        |         |         |         |        |               |              |
|             |                          |     |           | Scale  |          | 1.5402 | 0.1453  | 1.2801  | 1.8531  |        |               |              |
| IL_12P40    | Number of Observations   | 64  | Intercept |        | 2.1230   | 0.5765 | 0.9930  | 3.2529  | 13.56   | 0.0002 |               |              |
|             | Noncensored Values       | 46  | Group     | HES    | 1.6667   | 1.5442 | -1.3599 | 4.6932  | 1.16    | 0.2805 | 5.72          | 0.1262       |
|             | Right Censored Values    | 0   |           | CTR    | -2.5175  | 1.3364 | -5.1368 | 0.1018  | 3.55    | 0.0596 |               |              |
|             | Left Censored Values     | 18  |           | AST    | 0.4681   | 1.3921 | -2.2603 | 3.1964  | 0.11    | 0.7367 |               |              |
|             | Interval Censored Values | 0   |           | ACT    | 0.0000   |        |         |         |         |        |               |              |
|             |                          |     |           | Scale  |          | 3.5090 | 0.3992  | 2.8077  | 4.3854  |        |               |              |
| MDC         | Number of Observations   | 64  | Intercept |        | 6.9624   | 0.0935 | 6.7792  | 7.1457  | 5545.64 | <.0001 |               |              |
|             | Noncensored Values       | 64  | Group     | HES    | 0.4851   | 0.2589 | -0.0222 | 0.9925  | 3.51    | 0.0609 | 19.46         | 0.0002       |
|             | Right Censored Values    | 0   |           | CTR    | 0.8064   | 0.2091 | 0.3967  | 1.2162  | 14.88   | 0.0001 |               |              |
|             | Left Censored Values     | 0   |           | AST    | 0.5817   | 0.2290 | 0.1328  | 1.0305  | 6.45    | 0.0111 |               |              |
|             | Interval Censored Values | 0   |           | ACT    | 0.0000   |        |         |         |         |        |               |              |
|             |                          |     |           | Scale  |          | 0.5913 | 0.0523  | 0.4973  | 0.7032  |        |               |              |
| IL_12P70    | Number of Observations   | 64  | Intercept |        | 2.1253   | 0.4558 | 1.2319  | 3.0187  | 21.74   | <.0001 |               |              |
|             | Noncensored Values       | 61  | Group     | HES    | 0.9342   | 1.2578 | -1.5311 | 3.3995  | 0.55    | 0.4577 | 3.46          | 0.3255       |
|             | Right Censored Values    | 0   |           | CTR    | 1.6074   | 1.0161 | -0.3840 | 3.5988  | 2.50    | 0.1137 |               |              |
|             | Left Censored Values     | 3   |           | AST    | 1.3101   | 1.1129 | -0.8711 | 3.4913  | 1.39    | 0.2391 |               |              |
|             | Interval Censored Values | 0   |           | ACT    | 0.0000   |        |         |         |         |        |               |              |
|             |                          |     |           | Scale  |          | 2.8716 | 0.2644  | 2.3975  | 3.4395  |        |               |              |

| Outcome | Label 1                  | Num | Parameter | Level1 | Estimate         | StdErr                | LowerCL | UpperCL | ChiSq     | PVal   | ChiSq Overall | PVal Overall |
|---------|--------------------------|-----|-----------|--------|------------------|-----------------------|---------|---------|-----------|--------|---------------|--------------|
| PDGF_AA | Number of Observations   | 64  | Intercept |        | 7.9272           | 0.0217                | 7.8846  | 7.9697  | 133279.36 | <.0001 |               |              |
|         | Noncensored Values       | 64  | Group     | HES    | -0.0087          | 0.0601                | -0.1265 | 0.1092  | 0.02      | 0.8851 | 3.52          | 0.3184       |
|         | Right Censored Values    | 0   |           | CTR    | -0.0839          | 0.0486                | -0.1791 | 0.0112  | 2.99      | 0.0839 |               |              |
|         | Left Censored Values     | 0   |           | AST    | 0.0213           | 0.0532                | -0.0830 | 0.1255  | 0.16      | 0.6895 |               |              |
|         | Interval Censored Values | 0   |           | ACT    | 0.0000           |                       |         |         |           |        |               |              |
|         |                          |     |           | Scale  |                  | 0.1373                | 0.0121  | 0.1155  | 0.1633    |        |               |              |
| IL_13   | Number of Observations   | 64  | Intercept |        | -3.1964          | 0.8960                | -4.9524 | -1.4403 | 12.73     | 0.0004 |               |              |
|         | Noncensored Values       | 40  | Group     | HES    | 3.3871           | 2.2505                | -1.0238 | 7.7980  | 2.27      | 0.1323 | 5.95          | 0.1142       |
|         | Right Censored Values    | 0   |           | CTR    | 3.0478           | 1.8335                | -0.5459 | 6.6414  | 2.76      | 0.0965 |               |              |
|         | Left Censored Values     | 24  |           | AST    | 3.5466           | 2.0076                | -0.3883 | 7.4815  | 3.12      | 0.0773 |               |              |
|         | Interval Censored Values | 0   |           | ACT    | 0.0000           |                       |         |         |           |        |               |              |
|         |                          |     |           | Scale  |                  | 4.9914                | 0.6185  | 3.9151  | 6.3636    |        |               |              |
| PDGF_BB | Number of Observations   | 64  | Intercept |        | 9.8450           | 0.5155                | 8.8346  | 10.8554 | 364.69    | <.0001 |               |              |
|         | Noncensored Values       | 6   | Group     | HES    | 5.132838063.1807 | -74597.330674607.5962 | 0.00    | 0.9999  | 0.44      | 0.9312 |               |              |
|         | Right Censored Values    | 58  |           | CTR    | -0.3147          | 0.4727                | -1.2412 | 0.6118  | 0.44      | 0.5056 |               |              |
|         | Left Censored Values     | 0   |           | AST    | 5.132832963.6815 | -64602.495764612.7613 | 0.00    | 0.9999  |           |        |               |              |
|         | Interval Censored Values | 0   |           | ACT    | 0.0000           |                       |         |         |           |        |               |              |
|         |                          |     |           | Scale  |                  | 0.9001                | 0.3259  | 0.4426  | 1.8302    |        |               |              |
| IL_15   | Number of Observations   | 64  | Intercept |        | 1.3095           | 0.5693                | 0.1936  | 2.4253  | 5.29      | 0.0214 |               |              |
|         | Noncensored Values       | 52  | Group     | HES    | 0.8253           | 1.5594                | -2.2311 | 3.8818  | 0.28      | 0.5966 | 8.14          | 0.0432       |
|         | Right Censored Values    | 0   |           | CTR    | -3.5642          | 1.3335                | -6.1779 | -0.9506 | 7.14      | 0.0075 |               |              |
|         | Left Censored Values     | 12  |           | AST    | -0.0601          | 1.3897                | -2.7840 | 2.6637  | 0.00      | 0.9655 |               |              |
|         | Interval Censored Values | 0   |           | ACT    | 0.0000           |                       |         |         |           |        |               |              |
|         |                          |     |           | Scale  |                  | 3.5562                | 0.3709  | 2.8987  | 4.3627    |        |               |              |
| sCD40L  | Number of Observations   | 64  | Intercept |        | 8.1308           | 0.1235                | 7.8888  | 8.3729  | 4334.59   | <.0001 |               |              |
|         | Noncensored Values       | 64  | Group     | HES    | 0.5402           | 0.3420                | -0.1300 | 1.2104  | 2.50      | 0.1142 | 12.42         | 0.0061       |
|         | Right Censored Values    | 0   |           | CTR    | -0.4884          | 0.2761                | -1.0296 | 0.0529  | 3.13      | 0.0770 |               |              |
|         | Left Censored Values     | 0   |           | AST    | 0.6767           | 0.3025                | 0.0838  | 1.2696  | 5.00      | 0.0253 |               |              |
|         | Interval Censored Values | 0   |           | ACT    | 0.0000           |                       |         |         |           |        |               |              |
|         |                          |     |           | Scale  |                  | 0.7811                | 0.0690  | 0.6568  | 0.9288    |        |               |              |
| IL_17A  | Number of Observations   | 64  | Intercept |        | 3.0002           | 0.2113                | 2.5861  | 3.4144  | 201.58    | <.0001 |               |              |
|         | Noncensored Values       | 64  | Group     | HES    | 0.1765           | 0.5851                | -0.9703 | 1.3232  | 0.09      | 0.7629 | 13.73         | 0.0033       |
|         | Right Censored Values    | 0   |           | CTR    | 1.6366           | 0.4725                | 0.7105  | 2.5627  | 12.00     | 0.0005 |               |              |
|         | Left Censored Values     | 0   |           | AST    | 0.9624           | 0.5176                | -0.0521 | 1.9769  | 3.46      | 0.0630 |               |              |
|         | Interval Censored Values | 0   |           | ACT    | 0.0000           |                       |         |         |           |        |               |              |
|         |                          |     |           | Scale  |                  | 1.3365                | 0.1181  | 1.1239  | 1.5893    |        |               |              |
| IL_1RA  | Number of Observations   | 64  | Intercept |        | 4.4705           | 0.1895                | 4.0991  | 4.8419  | 556.52    | <.0001 |               |              |
|         | Noncensored Values       | 64  | Group     | HES    | 0.1673           | 0.5247                | -0.8611 | 1.1957  | 0.10      | 0.7499 | 1.55          | 0.6700       |
|         | Right Censored Values    | 0   |           | CTR    | 0.5246           | 0.4237                | -0.3059 | 1.3552  | 1.53      | 0.2157 |               |              |
|         | Left Censored Values     | 0   |           | AST    | 0.1463           | 0.4642                | -0.7635 | 1.0561  | 0.10      | 0.7526 |               |              |
|         | Interval Censored Values | 0   |           | ACT    | 0.0000           |                       |         |         |           |        |               |              |
|         |                          |     |           | Scale  |                  | 1.1985                | 0.1059  | 1.0079  | 1.4252    |        |               |              |
| IL_1a   | Number of Observations   | 64  | Intercept |        | 2.9723           | 0.2848                | 2.4140  | 3.5306  | 108.89    | <.0001 |               |              |
|         | Noncensored Values       | 62  | Group     | HES    | 0.5451           | 0.7868                | -0.9970 | 2.0872  | 0.48      | 0.4884 | 10.17         | 0.0172       |
|         | Right Censored Values    | 0   |           | CTR    | 1.6855           | 0.6355                | 0.4399  | 2.9312  | 7.03      | 0.0080 |               |              |
|         | Left Censored Values     | 2   |           | AST    | 1.5505           | 0.6961                | 0.1862  | 2.9149  | 4.96      | 0.0259 |               |              |
|         | Interval Censored Values | 0   |           | ACT    | 0.0000           |                       |         |         |           |        |               |              |
|         |                          |     |           | Scale  |                  | 1.7966                | 0.1630  | 1.5038  | 2.1463    |        |               |              |
| IL_9    | Number of Observations   | 64  | Intercept |        | -0.3846          | 0.6838                | -1.7249 | 0.9557  | 0.32      | 0.5738 |               |              |
|         | Noncensored Values       | 47  | Group     | HES    | 0.2997           | 1.8551                | -3.3362 | 3.9355  | 0.03      | 0.8717 | 1.18          | 0.7586       |
|         | Right Censored Values    | 0   |           | CTR    | -1.3872          | 1.5423                | -4.4100 | 1.6356  | 0.81      | 0.3684 |               |              |
|         | Left Censored Values     | 17  |           | AST    | 0.6305           | 1.6361                | -2.5762 | 3.8373  | 0.15      | 0.6999 |               |              |
|         | Interval Censored Values | 0   |           | ACT    | 0.0000           |                       |         |         |           |        |               |              |
|         |                          |     |           | Scale  |                  | 4.1624                | 0.4670  | 3.3407  | 5.1861    |        |               |              |
| IL_1B   | Number of Observations   | 64  | Intercept |        | 1.3034           | 0.3845                | 0.5498  | 2.0569  | 11.49     | 0.0007 |               |              |
|         | Noncensored Values       | 64  | Group     | HES    | -0.3359          | 1.0646                | -2.4224 | 1.7506  | 0.10      | 0.7523 | 3.16          | 0.3673       |
|         | Right Censored Values    | 0   |           | CTR    | 1.4402           | 0.8597                | -0.2448 | 3.1253  | 2.81      | 0.0939 |               |              |
|         | Left Censored Values     | 0   |           | AST    | 0.1726           | 0.9418                | -1.6732 | 2.0185  | 0.03      | 0.8546 |               |              |
|         | Interval Censored Values | 0   |           | ACT    | 0.0000           |                       |         |         |           |        |               |              |
|         |                          |     |           | Scale  |                  | 2.4316                | 0.2149  | 2.0449  | 2.8916    |        |               |              |

| Outcome | Label 1                  | Num | Parameter | Level1 | Estimate | StdErr | LowerCL | UpperCL | ChiSq    | PVal   | ChiSq Overall | PVal Overall |
|---------|--------------------------|-----|-----------|--------|----------|--------|---------|---------|----------|--------|---------------|--------------|
| IL_2    | Number of Observations   | 64  | Intercept |        | 0.9707   | 0.5009 | -0.0110 | 1.9524  | 3.76     | 0.0526 | 0.64          | 0.8882       |
|         | Noncensored Values       | 56  | Group     | HES    | 0.7430   | 1.3704 | -1.9430 | 3.4291  | 0.29     | 0.5877 |               |              |
|         | Right Censored Values    | 0   |           | CTR    | 0.7065   | 1.1078 | -1.4647 | 2.8778  | 0.41     | 0.5236 |               |              |
|         | Left Censored Values     | 8   |           | AST    | 0.4243   | 1.2201 | -1.9671 | 2.8157  | 0.12     | 0.7280 |               |              |
|         | Interval Censored Values | 0   |           | ACT    | 0.0000   |        |         |         |          |        |               |              |
|         |                          |     | Scale     |        | 3.1247   | 0.3087 | 2.5746  | 3.7923  |          |        |               |              |
| IL_3    | Number of Observations   | 64  | Intercept |        | -1.1157  | 0.2440 | -1.5940 | -0.6375 | 20.91    | <.0001 | 5.59          | 0.1334       |
|         | Noncensored Values       | 64  | Group     | HES    | 0.9478   | 0.6756 | -0.3764 | 2.2720  | 1.97     | 0.1607 |               |              |
|         | Right Censored Values    | 0   |           | CTR    | -0.4573  | 0.5456 | -1.5267 | 0.6121  | 0.70     | 0.4020 |               |              |
|         | Left Censored Values     | 0   |           | AST    | 0.9344   | 0.5977 | -0.2370 | 2.1059  | 2.44     | 0.1180 |               |              |
|         | Interval Censored Values | 0   |           | ACT    | 0.0000   |        |         |         |          |        |               |              |
|         |                          |     | Scale     |        | 1.5432   | 0.1364 | 1.2978  | 1.8351  |          |        |               |              |
| IL_4    | Number of Observations   | 64  | Intercept |        | -2.6603  | 0.7749 | -4.1790 | -1.1415 | 11.79    | 0.0006 | 10.57         | 0.0143       |
|         | Noncensored Values       | 32  | Group     | HES    | 2.0901   | 1.7708 | -1.3807 | 5.5609  | 1.39     | 0.2379 |               |              |
|         | Right Censored Values    | 0   |           | CTR    | 4.4827   | 1.4249 | 1.6900  | 7.2754  | 9.90     | 0.0017 |               |              |
|         | Left Censored Values     | 32  |           | AST    | 2.2239   | 1.5792 | -0.8714 | 5.3191  | 1.98     | 0.1591 |               |              |
|         | Interval Censored Values | 0   |           | ACT    | 0.0000   |        |         |         |          |        |               |              |
|         |                          |     | Scale     |        | 3.7714   | 0.5356 | 2.8550  | 4.9819  |          |        |               |              |
| IL_5    | Number of Observations   | 64  | Intercept |        | -0.0697  | 0.3031 | -0.6638 | 0.5243  | 0.05     | 0.8180 | 4.56          | 0.2068       |
|         | Noncensored Values       | 64  | Group     | HES    | 0.7169   | 0.8392 | -0.9279 | 2.3617  | 0.73     | 0.3930 |               |              |
|         | Right Censored Values    | 0   |           | CTR    | -0.3568  | 0.6777 | -1.6851 | 0.9715  | 0.28     | 0.5985 |               |              |
|         | Left Censored Values     | 0   |           | AST    | 1.3449   | 0.7424 | -0.1101 | 2.8000  | 3.28     | 0.0700 |               |              |
|         | Interval Censored Values | 0   |           | ACT    | 0.0000   |        |         |         |          |        |               |              |
|         |                          |     | Scale     |        | 1.9169   | 0.1694 | 1.6120  | 2.2794  |          |        |               |              |
| IL_6    | Number of Observations   | 64  | Intercept |        | 0.7468   | 0.4449 | -0.1252 | 1.6188  | 2.82     | 0.0932 | 8.41          | 0.0382       |
|         | Noncensored Values       | 64  | Group     | HES    | -0.4215  | 1.2319 | -2.8360 | 1.9930  | 0.12     | 0.7322 |               |              |
|         | Right Censored Values    | 0   |           | CTR    | 2.6875   | 0.9948 | 0.7377  | 4.6374  | 7.30     | 0.0069 |               |              |
|         | Left Censored Values     | 0   |           | AST    | 1.1811   | 1.0898 | -0.9548 | 3.3171  | 1.17     | 0.2785 |               |              |
|         | Interval Censored Values | 0   |           | ACT    | 0.0000   |        |         |         |          |        |               |              |
|         |                          |     | Scale     |        | 2.8138   | 0.2487 | 2.3663  | 3.3461  |          |        |               |              |
| IL_7    | Number of Observations   | 64  | Intercept |        | 1.5757   | 0.2248 | 1.1351  | 2.0163  | 49.14    | <.0001 | 0.63          | 0.8890       |
|         | Noncensored Values       | 62  | Group     | HES    | 0.1605   | 0.6220 | -1.0586 | 1.3796  | 0.07     | 0.7964 |               |              |
|         | Right Censored Values    | 0   |           | CTR    | 0.3937   | 0.5023 | -0.5909 | 1.3783  | 0.61     | 0.4332 |               |              |
|         | Left Censored Values     | 2   |           | AST    | 0.0996   | 0.5520 | -0.9822 | 1.1815  | 0.03     | 0.8568 |               |              |
|         | Interval Censored Values | 0   |           | ACT    | 0.0000   |        |         |         |          |        |               |              |
|         |                          |     | Scale     |        | 1.4206   | 0.1292 | 1.1886  | 1.6979  |          |        |               |              |
| IL_8    | Number of Observations   | 64  | Intercept |        | 3.5016   | 0.1596 | 3.1889  | 3.8144  | 481.56   | <.0001 | 141.77        | <.0001       |
|         | Noncensored Values       | 64  | Group     | HES    | -0.2476  | 0.4418 | -1.1136 | 0.6183  | 0.31     | 0.5752 |               |              |
|         | Right Censored Values    | 0   |           | CTR    | 4.1536   | 0.3568 | 3.4543  | 4.8529  | 135.52   | <.0001 |               |              |
|         | Left Censored Values     | 0   |           | AST    | 0.5723   | 0.3909 | -0.1937 | 1.3384  | 2.14     | 0.1431 |               |              |
|         | Interval Censored Values | 0   |           | ACT    | 0.0000   |        |         |         |          |        |               |              |
|         |                          |     | Scale     |        | 1.0092   | 0.0892 | 0.8487  | 1.2001  |          |        |               |              |
| IP_10   | Number of Observations   | 64  | Intercept |        | 4.6309   | 0.1112 | 4.4129  | 4.8488  | 1733.79  | <.0001 | 5.38          | 0.1459       |
|         | Noncensored Values       | 64  | Group     | HES    | -0.3174  | 0.3079 | -0.9210 | 0.2861  | 1.06     | 0.3026 |               |              |
|         | Right Censored Values    | 0   |           | CTR    | 0.0954   | 0.2487 | -0.3920 | 0.5828  | 0.15     | 0.7014 |               |              |
|         | Left Censored Values     | 0   |           | AST    | 0.5153   | 0.2724 | -0.0186 | 1.0492  | 3.58     | 0.0586 |               |              |
|         | Interval Censored Values | 0   |           | ACT    | 0.0000   |        |         |         |          |        |               |              |
|         |                          |     | Scale     |        | 0.7034   | 0.0622 | 0.5915  | 0.8364  |          |        |               |              |
| MCP_1   | Number of Observations   | 64  | Intercept |        | 6.5046   | 0.0645 | 6.3781  | 6.6310  | 10161.55 | <.0001 | 14.12         | 0.0028       |
|         | Noncensored Values       | 64  | Group     | HES    | -0.2026  | 0.1787 | -0.5527 | 0.1476  | 1.29     | 0.2569 |               |              |
|         | Right Censored Values    | 0   |           | CTR    | 0.4802   | 0.1443 | 0.1974  | 0.7630  | 11.08    | 0.0009 |               |              |
|         | Left Censored Values     | 0   |           | AST    | 0.0000   | 0.1581 | -0.3098 | 0.3098  | 0.00     | 0.9998 |               |              |
|         | Interval Censored Values | 0   |           | ACT    | 0.0000   |        |         |         |          |        |               |              |
|         |                          |     | Scale     |        | 0.4081   | 0.0361 | 0.3432  | 0.4853  |          |        |               |              |
| MIP_1a  | Number of Observations   | 64  | Intercept |        | 2.3123   | 0.1993 | 1.9217  | 2.7030  | 134.61   | <.0001 | 48.70         | <.0001       |
|         | Noncensored Values       | 61  | Group     | HES    | 0.2962   | 0.5496 | -0.7811 | 1.3735  | 0.29     | 0.5900 |               |              |
|         | Right Censored Values    | 0   |           | CTR    | 3.0718   | 0.4440 | 2.2015  | 3.9421  | 47.86    | <.0001 |               |              |
|         | Left Censored Values     | 3   |           | AST    | 0.9132   | 0.4863 | -0.0400 | 1.8664  | 3.53     | 0.0604 |               |              |
|         | Interval Censored Values | 0   |           | ACT    | 0.0000   |        |         |         |          |        |               |              |
|         |                          |     | Scale     |        | 1.2547   | 0.1154 | 1.0478  | 1.5025  |          |        |               |              |

| Outcome   | Label 1                  | Num | Parameter | Level1 | Estimate           | StdErr                      | LowerCL | UpperCL | ChiSq   | PVal   | ChiSq Overall | PVal Overall |
|-----------|--------------------------|-----|-----------|--------|--------------------|-----------------------------|---------|---------|---------|--------|---------------|--------------|
| MIP_1B    | Number of Observations   | 64  | Intercept |        | 4.7136             | 0.1420                      | 4.4352  | 4.9920  | 1101.13 | <.0001 |               |              |
|           | Noncensored Values       | 64  | Group     | HES    | 0.1706             | 0.3933                      | -0.6003 | 0.9414  | 0.19    | 0.6646 | 16.74         | 0.0008       |
|           | Right Censored Values    | 0   |           | CTR    | 1.2732             | 0.3176                      | 0.6507  | 1.8958  | 16.07   | <.0001 |               |              |
|           | Left Censored Values     | 0   |           | AST    | 0.5134             | 0.3479                      | -0.1686 | 1.1953  | 2.18    | 0.1401 |               |              |
|           | Interval Censored Values | 0   |           | ACT    | 0.0000             |                             |         |         |         |        |               |              |
|           |                          |     | Scale     |        | 0.8984             | 0.0794                      | 0.7555  | 1.0683  |         |        |               |              |
| RANTES    | Number of Observations   | 64  | Intercept |        | 7.0521             | 0.1640                      | 6.7307  | 7.3734  | 1849.56 | <.0001 |               |              |
|           | Noncensored Values       | 53  | Group     | HES    | -0.2628            | 0.4501                      | -1.1449 | 0.6193  | 0.34    | 0.5593 | 14.58         | 0.0022       |
|           | Right Censored Values    | 11  |           | CTR    | 1.4132             | 0.3914                      | 0.6461  | 2.1803  | 13.04   | 0.0003 |               |              |
|           | Left Censored Values     | 0   |           | AST    | -0.0036            | 0.4011                      | -0.7898 | 0.7825  | 0.00    | 0.9928 |               |              |
|           | Interval Censored Values | 0   |           | ACT    | 0.0000             |                             |         |         |         |        |               |              |
|           |                          |     | Scale     |        | 1.0267             | 0.1045                      | 0.8409  | 1.2534  |         |        |               |              |
| TNFa      | Number of Observations   | 64  | Intercept |        | 3.2469             | 0.1197                      | 3.0123  | 3.4815  | 735.86  | <.0001 |               |              |
|           | Noncensored Values       | 64  | Group     | HES    | 0.5696             | 0.3314                      | -0.0800 | 1.2192  | 2.95    | 0.0857 | 23.26         | <.0001       |
|           | Right Censored Values    | 0   |           | CTR    | 1.2551             | 0.2676                      | 0.7305  | 1.7796  | 21.99   | <.0001 |               |              |
|           | Left Censored Values     | 0   |           | AST    | 0.4480             | 0.2932                      | -0.1267 | 1.0226  | 2.33    | 0.1265 |               |              |
|           | Interval Censored Values | 0   |           | ACT    | 0.0000             |                             |         |         |         |        |               |              |
|           |                          |     | Scale     |        | 0.7570             | 0.0669                      | 0.6366  | 0.9002  |         |        |               |              |
| TNFB      | Number of Observations   | 64  | Intercept |        | 0.4783             | 0.6543                      | -0.8042 | 1.7607  | 0.53    | 0.4648 |               |              |
|           | Noncensored Values       | 42  | Group     | HES    | 2.5897             | 1.6652                      | -0.6740 | 5.8534  | 2.42    | 0.1199 | 6.46          | 0.0914       |
|           | Right Censored Values    | 0   |           | CTR    | 1.4114             | 1.3588                      | -1.2518 | 4.0747  | 1.08    | 0.2989 |               |              |
|           | Left Censored Values     | 22  |           | AST    | 3.2365             | 1.4723                      | 0.3509  | 6.1221  | 4.83    | 0.0279 |               |              |
|           | Interval Censored Values | 0   |           | ACT    | 0.0000             |                             |         |         |         |        |               |              |
|           |                          |     | Scale     |        | 3.7024             | 0.4412                      | 2.9312  | 4.6764  |         |        |               |              |
| VEGF_A    | Number of Observations   | 64  | Intercept |        | 5.7720             | 0.1400                      | 5.4975  | 6.0464  | 1699.20 | <.0001 |               |              |
|           | Noncensored Values       | 64  | Group     | HES    | 0.0144             | 0.3877                      | -0.7455 | 0.7743  | 0.00    | 0.9704 | 0.85          | 0.8363       |
|           | Right Censored Values    | 0   |           | CTR    | 0.2862             | 0.3131                      | -0.3275 | 0.8998  | 0.84    | 0.3607 |               |              |
|           | Left Censored Values     | 0   |           | AST    | 0.0806             | 0.3430                      | -0.5916 | 0.7529  | 0.06    | 0.8141 |               |              |
|           | Interval Censored Values | 0   |           | ACT    | 0.0000             |                             |         |         |         |        |               |              |
|           |                          |     | Scale     |        | 0.8856             | 0.0783                      | 0.7447  | 1.0531  |         |        |               |              |
| Eotaxin_2 | Number of Observations   | 64  | Intercept |        | 7.3087             | 0.1165                      | 7.0803  | 7.5371  | 3933.41 | <.0001 |               |              |
|           | Noncensored Values       | 64  | Group     | HES    | -0.0651            | 0.3227                      | -0.6975 | 0.5674  | 0.04    | 0.8402 | 0.30          | 0.9601       |
|           | Right Censored Values    | 0   |           | CTR    | 0.1219             | 0.2606                      | -0.3889 | 0.6326  | 0.22    | 0.6400 |               |              |
|           | Left Censored Values     | 0   |           | AST    | 0.0278             | 0.2855                      | -0.5317 | 0.5873  | 0.01    | 0.9224 |               |              |
|           | Interval Censored Values | 0   |           | ACT    | 0.0000             |                             |         |         |         |        |               |              |
|           |                          |     | Scale     |        | 0.7370             | 0.0651                      | 0.6198  | 0.8764  |         |        |               |              |
| TARC      | Number of Observations   | 64  | Intercept |        | 4.9619             | 0.0974                      | 4.7711  | 5.1527  | 2597.56 | <.0001 |               |              |
|           | Noncensored Values       | 64  | Group     | HES    | 0.3231             | 0.2696                      | -0.2053 | 0.8514  | 1.44    | 0.2307 | 13.06         | 0.0045       |
|           | Right Censored Values    | 0   |           | CTR    | -0.6899            | 0.2177                      | -1.1166 | -0.2632 | 10.04   | 0.0015 |               |              |
|           | Left Censored Values     | 0   |           | AST    | -0.1121            | 0.2385                      | -0.5795 | 0.3553  | 0.22    | 0.6384 |               |              |
|           | Interval Censored Values | 0   |           | ACT    | 0.0000             |                             |         |         |         |        |               |              |
|           |                          |     | Scale     |        | 0.6157             | 0.0544                      | 0.5178  | 0.7322  |         |        |               |              |
| Eotaxin_3 | Number of Observations   | 51  | Intercept |        | 2.4227             | 0.2401                      | 1.9521  | 2.8932  | 101.83  | <.0001 |               |              |
|           | Noncensored Values       | 51  | Group     | HES    | 0.0680             | 0.6999                      | -1.3039 | 1.4399  | 0.01    | 0.9226 | 2.37          | 0.4991       |
|           | Right Censored Values    | 0   |           | CTR    | -0.4244            | 0.4802                      | -1.3655 | 0.5167  | 0.78    | 0.3767 |               |              |
|           | Left Censored Values     | 0   |           | AST    | 0.5707             | 0.5520                      | -0.5111 | 1.6525  | 1.07    | 0.3012 |               |              |
|           | Interval Censored Values | 0   |           | ACT    | 0.0000             |                             |         |         |         |        |               |              |
|           |                          |     | Scale     |        | 1.3150             | 0.1302                      | 1.0830  | 1.5966  |         |        |               |              |
| TSLP      | Number of Observations   | 64  | Intercept |        | -2.0739            | 1.1506                      | -4.3290 | 0.1812  | 3.25    | 0.0715 |               |              |
|           | Noncensored Values       | 27  | Group     | HES    | 1.9617             | 2.5816                      | -3.0982 | 7.0215  | 0.58    | 0.4473 | 1.37          | 0.7127       |
|           | Right Censored Values    | 0   |           | CTR    | -0.6477            | 2.2445                      | -5.0469 | 3.7515  | 0.08    | 0.7729 |               |              |
|           | Left Censored Values     | 37  |           | AST    | 1.9216             | 2.3411                      | -2.6668 | 6.5100  | 0.67    | 0.4117 |               |              |
|           | Interval Censored Values | 0   |           | ACT    | 0.0000             |                             |         |         |         |        |               |              |
|           |                          |     | Scale     |        | 5.4502             | 0.8540                      | 4.0090  | 7.4097  |         |        |               |              |
| IL_33     | Number of Observations   | 64  | Intercept |        | -3.7957            | 1.7931                      | -7.3102 | -0.2812 | 4.48    | 0.0343 |               |              |
|           | Noncensored Values       | 18  | Group     | HES    | -41.621880091.6968 | -157018.4629156935.21930.00 |         |         | 0.9996  |        | 1.33          | 0.7218       |
|           | Right Censored Values    | 0   |           | CTR    | -0.3220            | 3.0261                      | -6.2530 | 5.6089  | 0.01    | 0.9152 |               |              |
|           | Left Censored Values     | 46  |           | AST    | 3.3770             | 3.0598                      | -2.6200 | 9.3740  | 1.22    | 0.2697 |               |              |
|           | Interval Censored Values | 0   |           | ACT    | 0.0000             |                             |         |         |         |        |               |              |
|           |                          |     | Scale     |        | 6.8883             | 1.3663                      | 4.6696  | 10.1611 |         |        |               |              |



| Outcome | Label 1                  | Num | Parameter | Level1 | Estimate | StdErr | LowerCL  | UpperCL | ChiSq   | PVal   | ChiSq Overall | PVal Overall |
|---------|--------------------------|-----|-----------|--------|----------|--------|----------|---------|---------|--------|---------------|--------------|
| IL_23   | Number of Observations   | 64  | Intercept |        | -3.6298  | 2.2854 | -8.1092  | 0.8495  | 2.52    | 0.1122 | 2.21          | 0.5305       |
|         | Noncensored Values       | 19  | Group     | HES    | -4.8383  | 5.7517 | -16.1114 | 6.4348  | 0.71    | 0.4002 |               |              |
|         | Right Censored Values    | 1   |           | CTR    | -0.7371  | 4.0294 | -8.6346  | 7.1604  | 0.03    | 0.8549 |               |              |
|         | Left Censored Values     | 44  |           | AST    | 4.3836   | 4.0605 | -3.5749  | 12.3421 | 1.17    | 0.2803 |               |              |
|         | Interval Censored Values | 0   |           | ACT    | 0.0000   |        |          |         |         |        |               |              |
|         |                          |     |           | Scale  | 9.2397   | 1.8053 | 6.3001   | 13.5510 |         |        |               |              |
| TRAIL   | Number of Observations   | 64  | Intercept |        | 3.2610   | 0.1517 | 2.9637   | 3.5584  | 461.92  | <.0001 | 13.73         | 0.0033       |
|         | Noncensored Values       | 62  | Group     | HES    | 0.7546   | 0.4195 | -0.0677  | 1.5769  | 3.23    | 0.0721 |               |              |
|         | Right Censored Values    | 0   |           | CTR    | 0.9990   | 0.3388 | 0.3348   | 1.6631  | 8.69    | 0.0032 |               |              |
|         | Left Censored Values     | 2   |           | AST    | 0.9126   | 0.3712 | 0.1851   | 1.6401  | 6.05    | 0.0139 |               |              |
|         | Interval Censored Values | 0   |           | ACT    | 0.0000   |        |          |         |         |        |               |              |
|         |                          |     |           | Scale  | 0.9581   | 0.0871 | 0.8016   | 1.1451  |         |        |               |              |
| IL_18   | Number of Observations   | 64  | Intercept |        | 3.0840   | 0.1207 | 2.8473   | 3.3206  | 652.36  | <.0001 | 1.00          | 0.8022       |
|         | Noncensored Values       | 64  | Group     | HES    | 0.3309   | 0.3343 | -0.3244  | 0.9862  | 0.98    | 0.3223 |               |              |
|         | Right Censored Values    | 0   |           | CTR    | 0.0732   | 0.2700 | -0.4560  | 0.6023  | 0.07    | 0.7864 |               |              |
|         | Left Censored Values     | 0   |           | AST    | 0.0660   | 0.2958 | -0.5136  | 0.6457  | 0.05    | 0.8233 |               |              |
|         | Interval Censored Values | 0   |           | ACT    | 0.0000   |        |          |         |         |        |               |              |
|         |                          |     |           | Scale  | 0.7636   | 0.0675 | 0.6422   | 0.9081  |         |        |               |              |
| sIL2Ra  | Number of Observations   | 64  | Intercept |        | 7.1327   | 0.1255 | 6.8867   | 7.3786  | 3230.87 | <.0001 | 6.83          | 0.0775       |
|         | Noncensored Values       | 64  | Group     | HES    | -0.6601  | 0.3475 | -1.3410  | 0.0209  | 3.61    | 0.0575 |               |              |
|         | Right Censored Values    | 0   |           | CTR    | -0.5619  | 0.2806 | -1.1119  | -0.0120 | 4.01    | 0.0452 |               |              |
|         | Left Censored Values     | 0   |           | AST    | -0.3263  | 0.3074 | -0.9288  | 0.2761  | 1.13    | 0.2884 |               |              |
|         | Interval Censored Values | 0   |           | ACT    | 0.0000   |        |          |         |         |        |               |              |
|         |                          |     |           | Scale  | 0.7936   | 0.0701 | 0.6674   | 0.9438  |         |        |               |              |
| sRAGE   | Number of Observations   | 64  | Intercept |        | 4.2039   | 0.1978 | 3.8163   | 4.5915  | 451.81  | <.0001 | 0.20          | 0.9774       |
|         | Noncensored Values       | 64  | Group     | HES    | -0.2216  | 0.5476 | -1.2949  | 0.8517  | 0.16    | 0.6857 |               |              |
|         | Right Censored Values    | 0   |           | CTR    | -0.0358  | 0.4422 | -0.9026  | 0.8309  | 0.01    | 0.9354 |               |              |
|         | Left Censored Values     | 0   |           | AST    | -0.1215  | 0.4844 | -1.0710  | 0.8280  | 0.06    | 0.8020 |               |              |
|         | Interval Censored Values | 0   |           | ACT    | 0.0000   |        |          |         |         |        |               |              |
|         |                          |     |           | Scale  | 1.2508   | 0.1106 | 1.0519   | 1.4874  |         |        |               |              |
